# Supplementary material for: SiO2@MnOx@Na2WO4@SiO2 core–shell-derived catalyst for oxidative coupling of methane
Source: Royal Society of Chemistry journal article supplement (doi:10.1039/d0ra05081d), 2020-01-01
Supplement: d0ra05081d1.pdf [file d0ra05081d1.pdf]

## Supplementary information

$\text{SiO}_2@\text{MnO}_x@\text{Na}_2\text{WO}_4@\text{SiO}_2$  core-shell-derived catalyst for oxidative coupling of methane

### Table of contents

Fig. S1. EDS-STEM images of fresh  $\text{SiO}_2@\text{Na}_2\text{WO}_4@\text{MnO}_x(\text{KMnO}_4)@\text{SiO}_2$ .

Fig. S2. Long term test results using  $\text{SiO}_2@\text{MnO}_x(\text{KMnO}_4)@\text{Na}_2\text{WO}_4@\text{SiO}_2$ .

Fig. S3. Mn 2p, Si 2p, and O 1s XPS results of (a)  $\text{Na}_2\text{WO}_4/\text{Mn}/\text{SiO}_2$ , (b)  $\text{SiO}_2@\text{MnO}_x(\text{KMnO}_4)$ , (c)  $\text{SiO}_2@\text{MnO}_x(\text{KMnO}_4)@\text{Na}_2\text{WO}_4$ , (d)  $\text{SiO}_2@\text{MnO}_x(\text{KMnO}_4)@\text{Na}_2\text{WO}_4@\text{SiO}_2$ , (e)  $\text{SiO}_2@\text{MnO}_x(\text{Mn-acetate})$ , (f)  $\text{SiO}_2@\text{MnO}_x(\text{Mn-acetate})@\text{Na}_2\text{WO}_4$ , and (g)  $\text{SiO}_2@\text{MnO}_x(\text{Mn-acetate})@\text{Na}_2\text{WO}_4@\text{SiO}_2$ .

Table S1. OCM results depending on catalysts.

Table S2. OCM results using  $\text{SiO}_2@\text{MnO}_x(\text{KMnO}_4)@\text{Na}_2\text{WO}_4@\text{SiO}_2$  depending on GHSV.

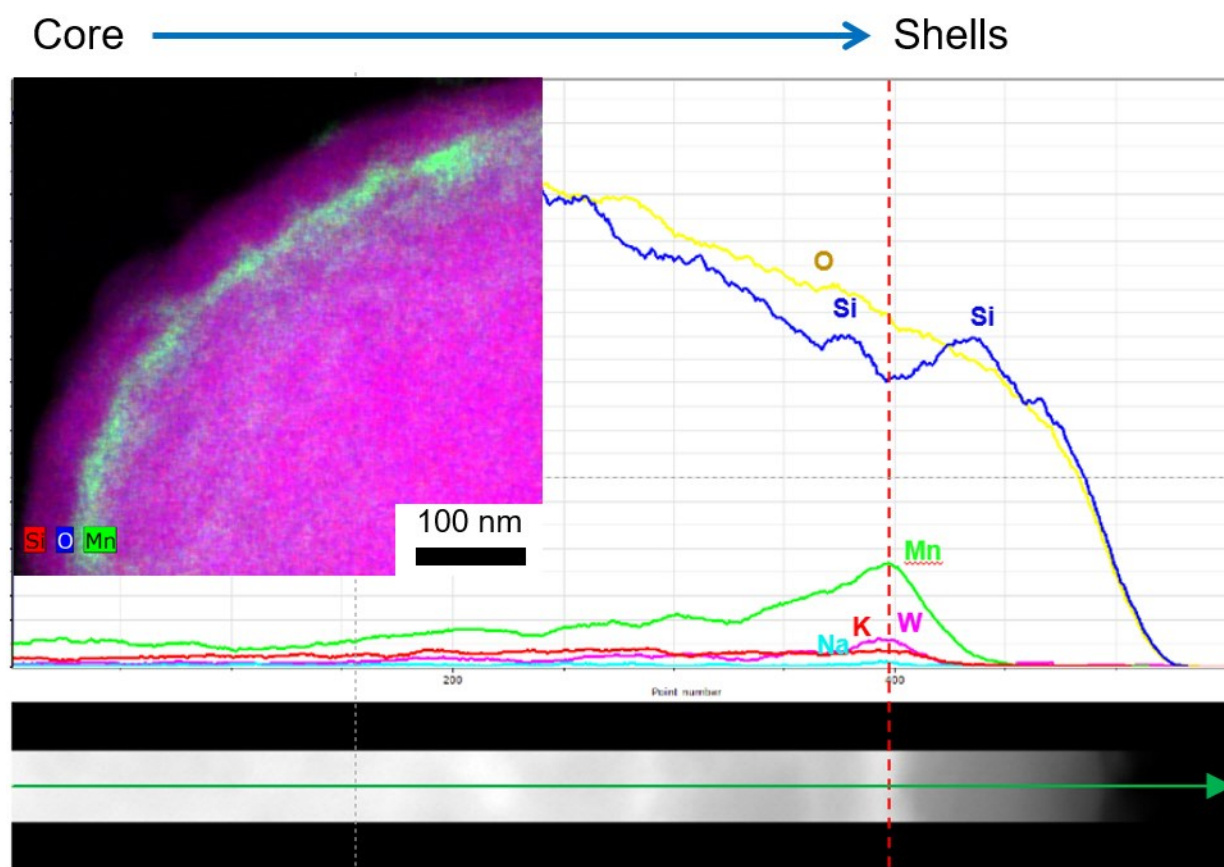

Fig. S1. EDS-STEM images of fresh  $\text{SiO}_2@Na_2WO_4@MnO_x(KMnO_4)@SiO_2$ .

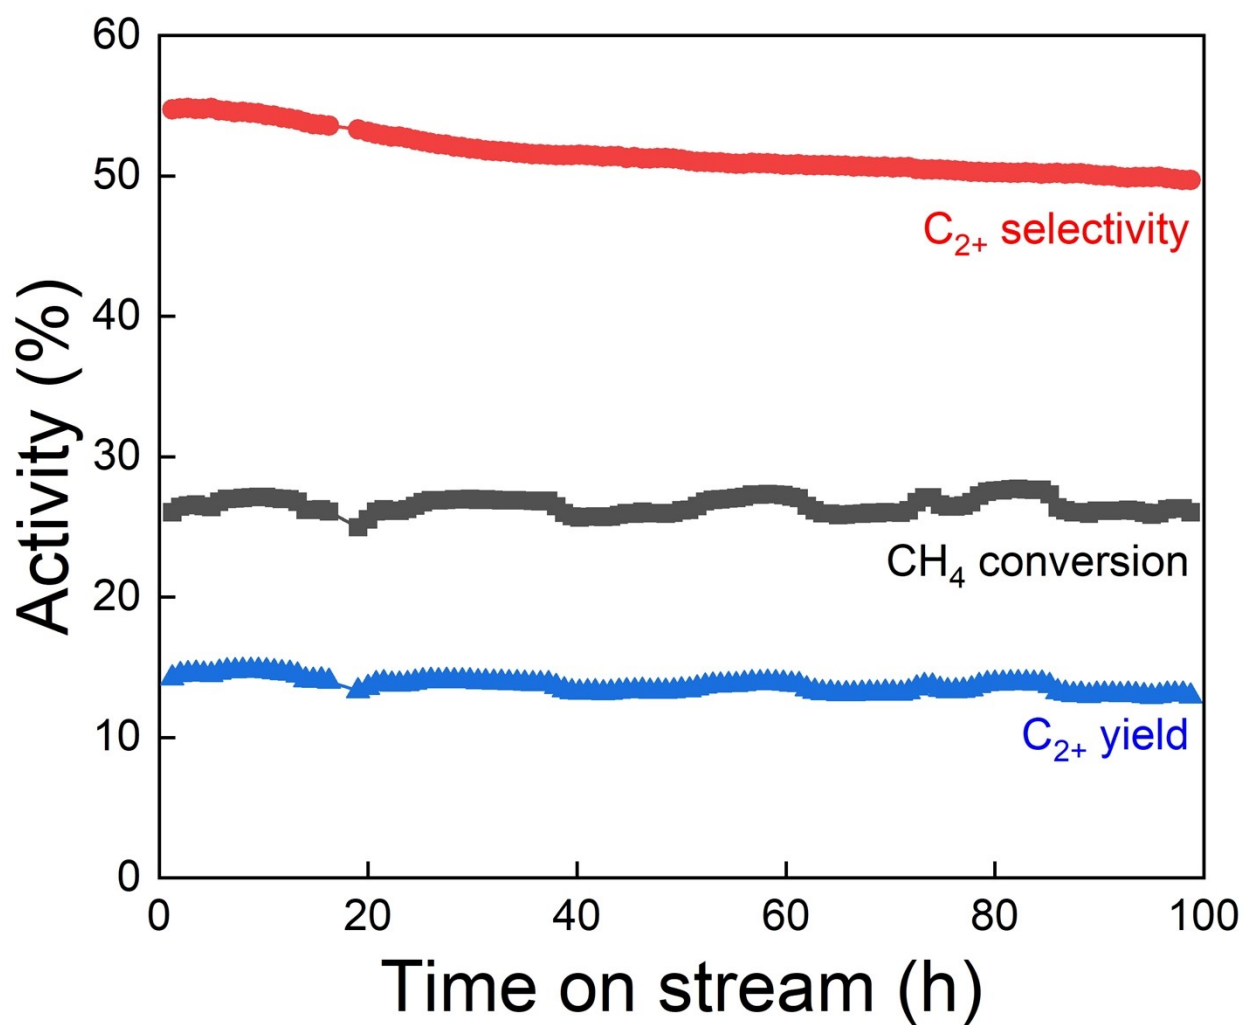

Fig. S2. Long term test results using  $\text{SiO}_2@\text{MnO}_x(\text{KMnO}_4)@\text{Na}_2\text{WO}_4@\text{SiO}_2$ . (GHSV = 20,000  $\text{h}^{-1}$ , temperature = 800 °C,  $\text{CH}_4/\text{O}_2/\text{N}_2 = 3/1/1$  mol/mol/mol.)

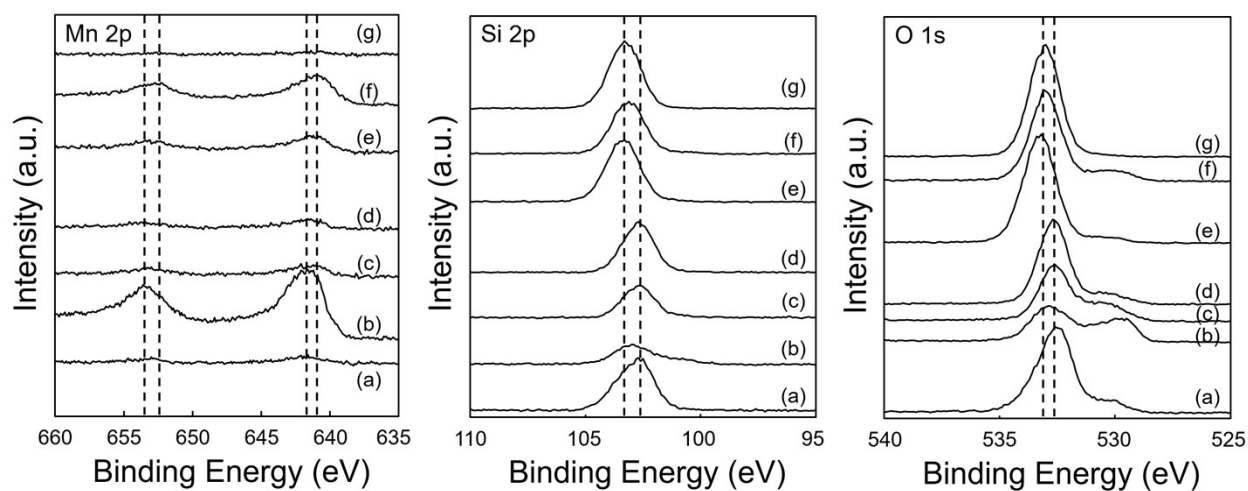

Fig. S3. Mn 2p, Si 2p, and O 1s XPS results of (a)  $\text{Na}_2\text{WO}_4/\text{Mn}/\text{SiO}_2$ , (b)  $\text{SiO}_2@\text{MnO}_x(\text{KMnO}_4)$ , (c)  $\text{SiO}_2@\text{MnO}_x(\text{KMnO}_4)@\text{Na}_2\text{WO}_4$ , (d)  $\text{SiO}_2@\text{MnO}_x(\text{KMnO}_4)@\text{Na}_2\text{WO}_4@\text{SiO}_2$ , (e)  $\text{SiO}_2@\text{MnO}_x(\text{Mn-acetate})$ , (f)  $\text{SiO}_2@\text{MnO}_x(\text{Mn-acetate})@\text{Na}_2\text{WO}_4$ , and (g)  $\text{SiO}_2@\text{MnO}_x(\text{Mn-acetate})@\text{Na}_2\text{WO}_4@\text{SiO}_2$ .

Table S1. OCM results depending on catalysts.<sup>a</sup>

| Temperature (°C)                                                                                          | CH <sub>4</sub> conversion (%) | C <sub>2+</sub> selectivity (%) | Olefins selectivity (%) | C <sub>2+</sub> yield (%) | Olefins/paraffins (mol/mol) | Carbon balance (%) |
|-----------------------------------------------------------------------------------------------------------|--------------------------------|---------------------------------|-------------------------|---------------------------|-----------------------------|--------------------|
| Na <sub>2</sub> WO <sub>4</sub> /Mn/SiO <sub>2</sub>                                                      |                                |                                 |                         |                           |                             |                    |
| 740                                                                                                       | 23.3                           | 52.3                            | 34.3                    | 12.2                      | 1.9                         | 98.5               |
| 770                                                                                                       | 29.1                           | 52.8                            | 37.7                    | 15.3                      | 2.5                         | 101.4              |
| 800                                                                                                       | 30.3                           | 48.2                            | 38.5                    | 14.6                      | 4.0                         | 94.7               |
| SiO <sub>2</sub> @MnO <sub>x</sub> (KMnO <sub>4</sub> )@Na <sub>2</sub> WO <sub>4</sub>                   |                                |                                 |                         |                           |                             |                    |
| 740                                                                                                       | 4.3                            | 49.8                            | 17.9                    | 2.2                       | 0.6                         | 116.5              |
| 770                                                                                                       | 9.5                            | 49.7                            | 27.0                    | 4.7                       | 1.2                         | 103.5              |
| 800                                                                                                       | 17.0                           | 46.4                            | 35.2                    | 7.9                       | 3.1                         | 103.6              |
| SiO <sub>2</sub> @MnO <sub>x</sub> (KMnO <sub>4</sub> )@Na <sub>2</sub> WO <sub>4</sub> @SiO <sub>2</sub> |                                |                                 |                         |                           |                             |                    |
| 740                                                                                                       | 10.8                           | 54.7                            | 26.7                    | 5.9                       | 1.0                         | 109.6              |
| 770                                                                                                       | 19.5                           | 53.8                            | 37.2                    | 10.5                      | 2.2                         | 107.0              |
| 800                                                                                                       | 25.4                           | 50.8                            | 40.3                    | 12.9                      | 3.8                         | 105.3              |
| SiO <sub>2</sub> @MnO <sub>x</sub> (Mn-acetate)@Na <sub>2</sub> WO <sub>4</sub> @SiO <sub>2</sub>         |                                |                                 |                         |                           |                             |                    |
| 740                                                                                                       | 7.7                            | 25.2                            | 9.7                     | 2.0                       | 0.6                         | 103.0              |
| 770                                                                                                       | 13.6                           | 33.7                            | 19.7                    | 4.6                       | 1.4                         | 101.7              |
| 800                                                                                                       | 21.9                           | 34.0                            | 26.2                    | 7.5                       | 3.4                         | 104.0              |

<sup>a</sup>GHSV = 20,000 h<sup>-1</sup>, CH<sub>4</sub>/O<sub>2</sub>/N<sub>2</sub> = 3/1/1 mol/mol/mol.

Table S2. OCM results using SiO<sub>2</sub>@MnO<sub>x</sub>(KMnO<sub>4</sub>)@Na<sub>2</sub>WO<sub>4</sub>@SiO<sub>2</sub> depending on GHSV.<sup>a</sup>

| Temperature (°C)              | CH <sub>4</sub> conversion (%) | C <sub>2+</sub> selectivity (%) | Olefins selectivity (%) | C <sub>2+</sub> yield (%) | Olefins/paraffins (mol/mol) | Carbon balance (%) |
|-------------------------------|--------------------------------|---------------------------------|-------------------------|---------------------------|-----------------------------|--------------------|
| GHSV = 20,000 h <sup>-1</sup> |                                |                                 |                         |                           |                             |                    |
| 740                           | 10.8                           | 54.7                            | 26.7                    | 5.93                      | 1.0                         | 109.6              |
| 770                           | 19.5                           | 53.8                            | 37.2                    | 10.5                      | 2.2                         | 107.0              |
| 800                           | 25.4                           | 50.8                            | 40.3                    | 12.9                      | 3.8                         | 105.3              |
| GHSV = 30,000 h <sup>-1</sup> |                                |                                 |                         |                           |                             |                    |
| 740                           | 7.1                            | 50.3                            | 18.5                    | 3.56                      | 0.6                         | 100.6              |
| 770                           | 14.2                           | 53.1                            | 30.7                    | 7.5                       | 1.4                         | 98.2               |
| 800                           | 23.5                           | 55.5                            | 40.2                    | 13.1                      | 2.6                         | 103.8              |
| GHSV = 50,000 h <sup>-1</sup> |                                |                                 |                         |                           |                             |                    |
| 740                           | 3.3                            | 52.1                            | 11.9                    | 1.73                      | 0.6                         | 110.4              |
| 770                           | 7.4                            | 58.2                            | 22.7                    | 4.3                       | 1.4                         | 101.9              |
| 800                           | 15.0                           | 60.5                            | 36.9                    | 9.1                       | 3.4                         | 101.6              |

<sup>a</sup>CH<sub>4</sub>/O<sub>2</sub>/N<sub>2</sub> = 3/1/1 mol/mol/mol.
